# Supplementary material
Source: PubMed Central journal article supplement (PMC7357328)
Supplement: djz200_supplementary_data.pdf [file djz200_supplementary_data.pdf]

# Opioid Patient Selection

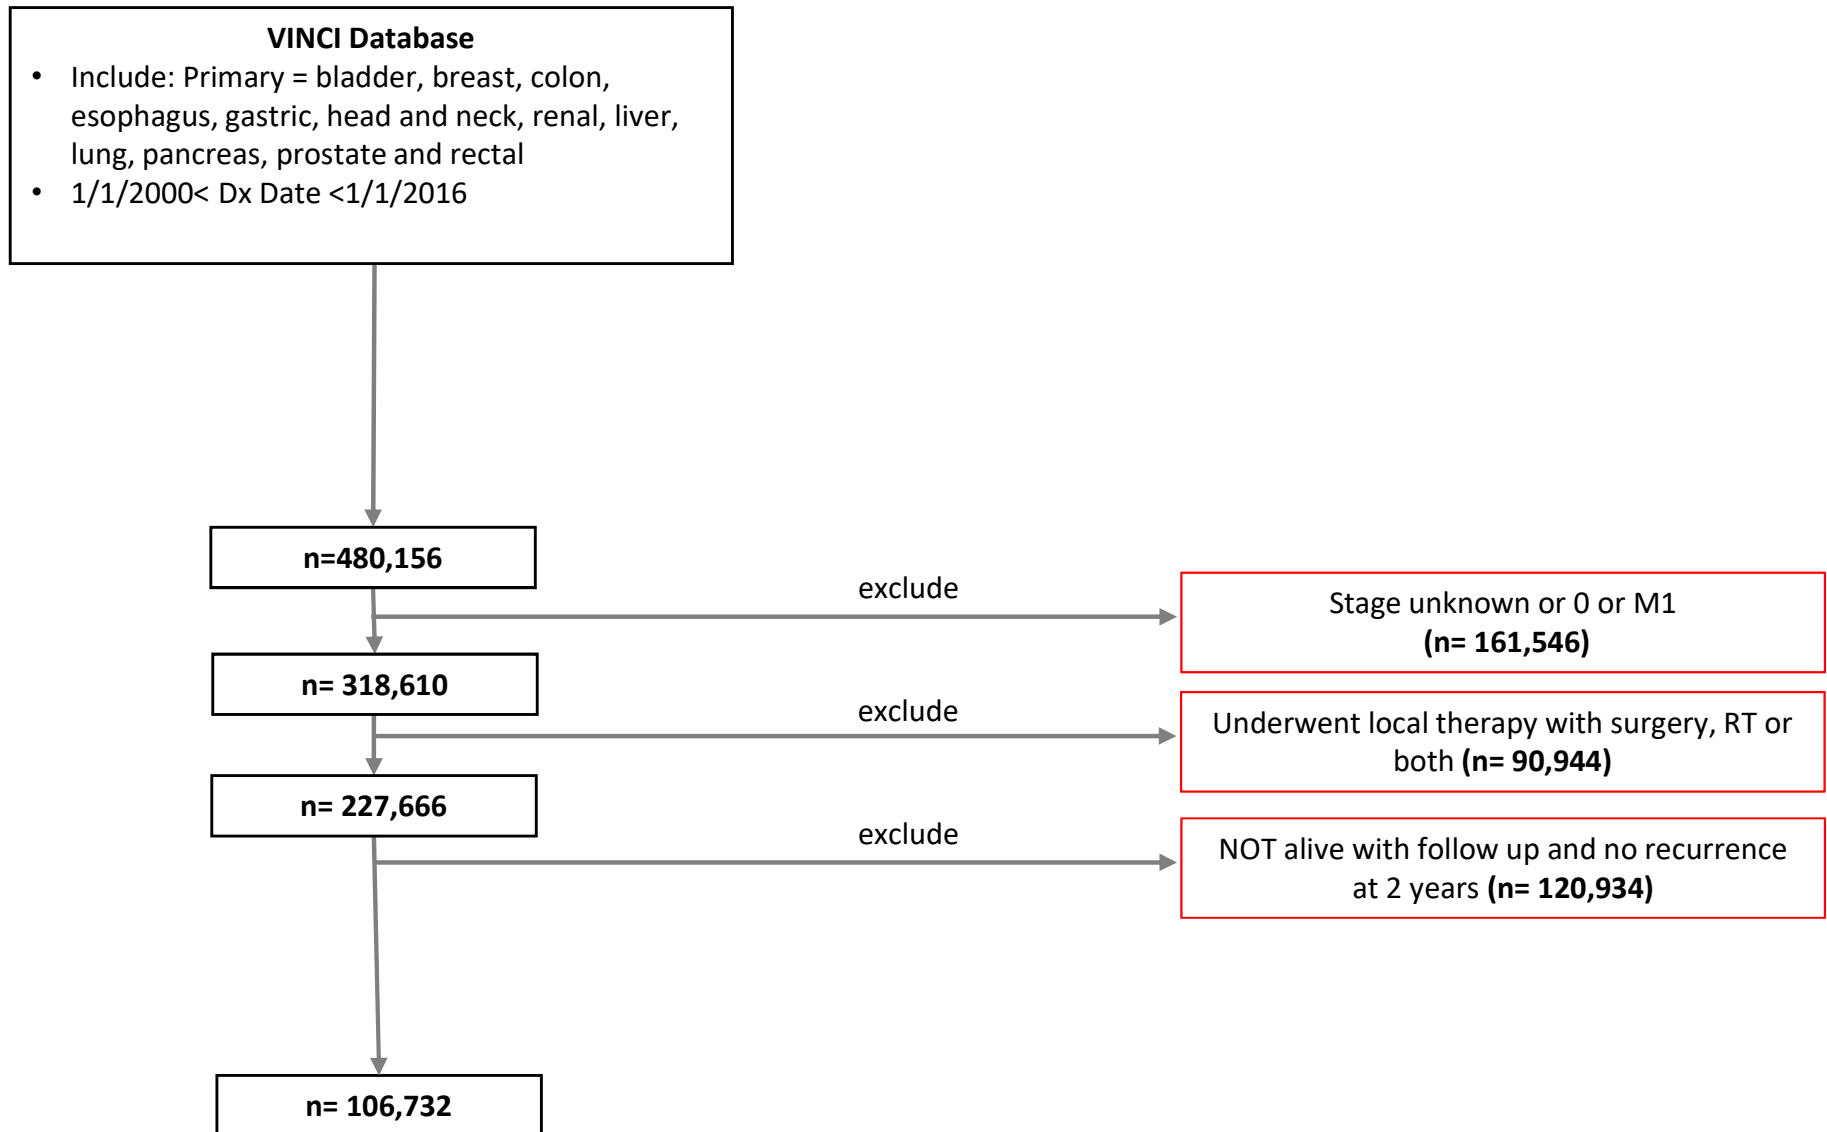

**Supplementary Figure 1: Patient selection for the cohort based on inclusion and exclusion criteria.**

Abbreviations: Dx, Diagnosis; M1, Metastatic Disease; RT, Radiation Therapy.

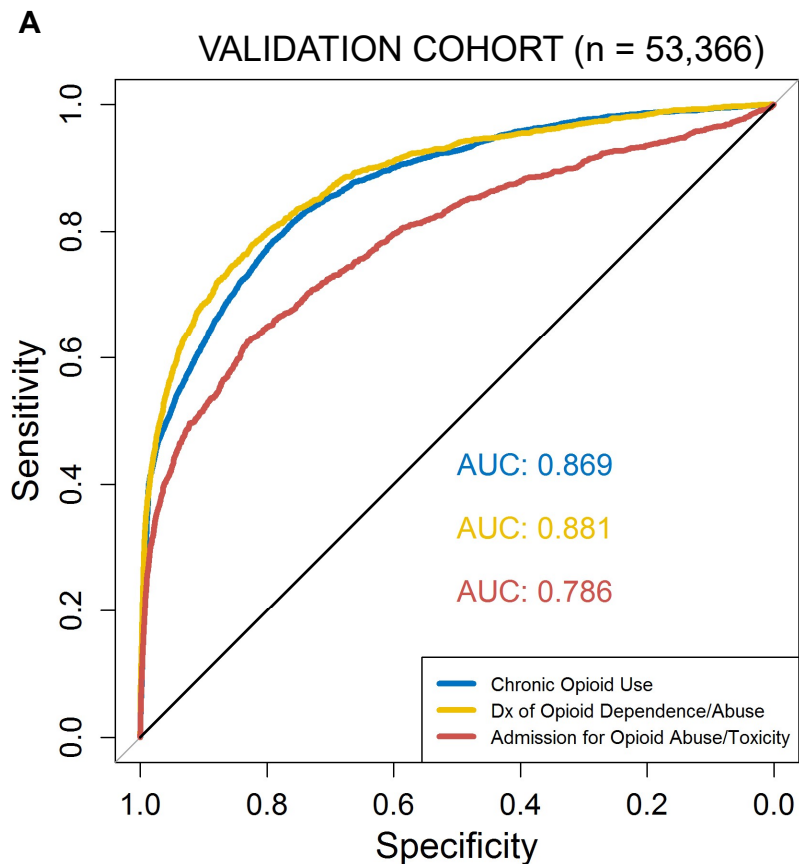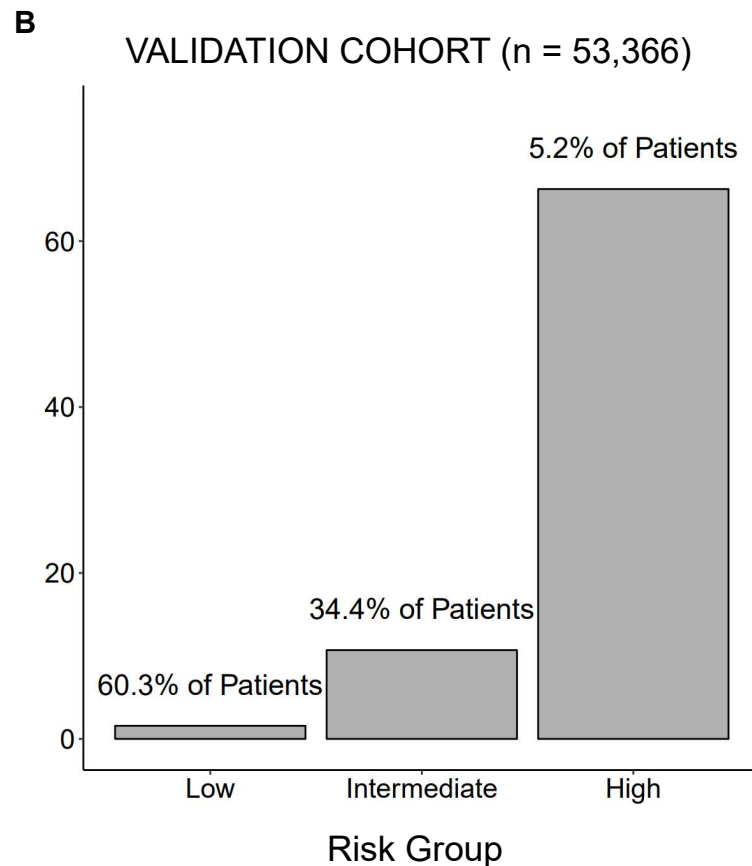

**Supplementary Figure 2: Validation of non-parsimonious model.** a) ROC curve showing discrimination of the full (non-parsimonious) LASSO model in predicting persistent opioid use, a future diagnosis of opioid abuse or dependence and future admissions for opioid abuse, dependence or toxicity. b) Bar plot showing incidence of persistent opioid use for the predicted risk groups using the full LASSO model. Abbreviations: AUC, Area under the curve; Dx, Diagnosis.

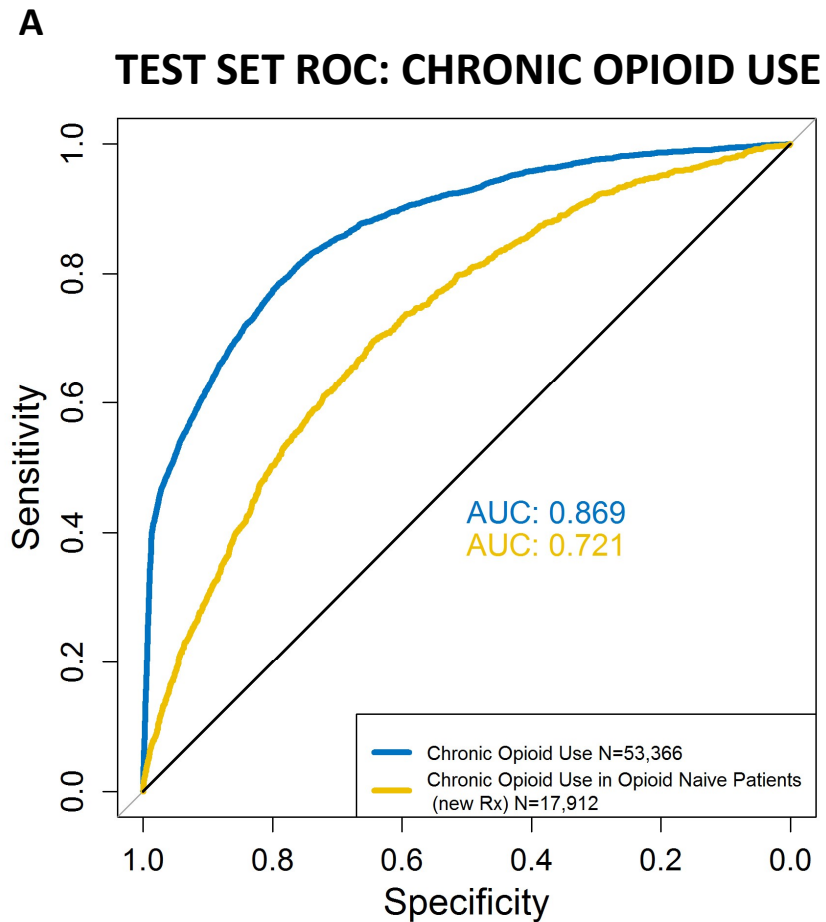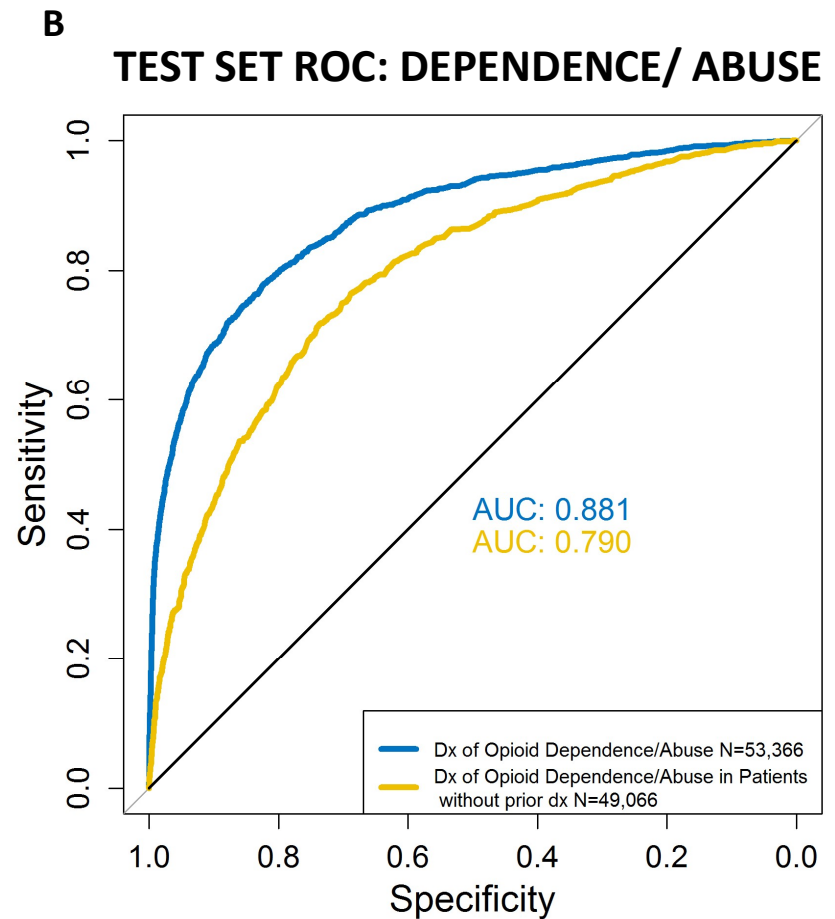

**Supplementary Figure 3: Validation of models among opioid naïve patients and those without a prior diagnosis of addiction.** ROC curve showing discrimination of LASSO model in predicting a) persistent opioid use for all patients and among opioid naïve patients with a new prescription during treatment and b) a diagnosis of opioid dependence or abuse among all patients and those without a prior diagnosis of substance abuse. Abbreviations: ROC, Receiver Operating Characteristic.; AUC, Area under the curve; Dx, diagnosis.

**Supplementary Table 1. Stratified Logistic Regression By Primary Type\***

|                                | Odds ratio (95% CI) |                  |                    |                  |                   |                   |
|--------------------------------|---------------------|------------------|--------------------|------------------|-------------------|-------------------|
|                                | PROSTATE            | COLON            | RECTUM             | BLADDER          | BREAST            | KIDNEY            |
| AJCC 7th ed. Stage (Ref: I)    |                     |                  |                    |                  |                   |                   |
| II                             | 1.03 (0.86-1.23)    | 1.19 (0.94-1.49) | 1.24 (0.74-2.08)   | 0.99 (0.7-1.41)  | 1.54 (1.09-2.17)  | 1.04 (0.77-1.40)  |
| III                            | 1.12 (0.89-1.42)    | 1.50 (1.13-2.00) | 0.93 (0.49-1.75)   | 1.55 (0.96-2.51) | 1.67 (0.93-3.00)  | 0.93 (0.68-1.26)  |
| IV                             | 1.58 (1.1-2.27)     | NA               | NA                 | 1 (0.44-2.27)    | NA                | 0.28 (0.06-1.35)  |
| Local Treatment (Ref: Surgery) |                     |                  |                    |                  |                   |                   |
| RT                             | 1.42 (1.28-1.57)    | NA               | NA                 | NA               | NA                | NA                |
| Surgery+RT                     | 1.28 (0.93-1.75)    | 1.72 (0.84-3.50) | 1.41 (0.76-2.60)   | 3.12 (1.68-5.81) | 0.81 (0.58-1.13)  | 3.34 (0.67-16.63) |
| Chemotherapy                   | 1.63 (0.41-6.41)    | 1.14 (0.84-1.54) | 0.90 (0.46-1.78)   | 0.72 (0.42-1.25) | 1.27 (0.88-1.82)  | 4.58 (1.57-13.41) |
|                                | GASTRIC             | LUNG             | PANCREAS           | HN               | ESOPHAGUS         | LIVER             |
| AJCC 7th ed. Stage (Ref: I)    |                     |                  |                    |                  |                   |                   |
| II                             | 1.62 (0.71-3.71)    | 1.49 (1.22-1.82) | 1.34 (0.51-3.56)   | 1.4 (1.14-1.72)  | 1.47 (0.77-2.83)  | 1.19 (0.73-1.94)  |
| III                            | 0.84 (0.26-2.7)     | 1.6 (1.25-2.04)  | 6.14 (0.30-124.45) | 1.23 (0.98-1.54) | 1.48 (0.71-3.08)  | 1.19 (0.34-4.19)  |
| IV                             | NA                  | NA               | NA                 | 1.50 (1.22-1.84) | NA                | NA                |
| Local Treatment (Ref: Surgery) |                     |                  |                    |                  |                   |                   |
| RT                             | NA                  | 1.71 (1.41-2.08) | NA                 | 1.16 (0.95-1.4)  | 1.81 (0.32-10.07) | NA                |
| Surgery+RT                     | 2.75 (1.05-7.19)    | 1.47 (1.04-2.07) | 2.72 (0.82-9.04)   | 1.11 (0.90-1.37) | 1.86 (0.51-6.70)  | NA                |
| Chemotherapy                   | 1.10 (0.40-3.04)    | 1.06 (0.85-1.32) | 0.92 (0.29-2.92)   | 1.10 (0.92-1.31) | 0.67 (0.13-3.45)  | 1.06 (0.14-8.19)  |

Abbreviations: Ref, Reference Group; NA, Not Applicable; AJCC, American Joint Committee on Cancer; ed., edition; HN, Head and Neck; RT, Radiation Therapy.

\* Logistic regression models for persistent opioid use with treatment and stage covariates separated by cancer type. Covariates are adjusted for patient and socioeconomic factors. 95% confidence intervals calculated from logistic regression model.

**Supplementary Table 2: LASSO Logistic Regression Predictive Modeling Covariates by Outcome for the full (non-parsimonious) models\***

| Variable                                              | Category/Unit          | Chronic Opioid Use | Chronic Opioid Use (Opioid Naïve-New Prescription) | Diagnosis of Opioid Dependence | New Diagnosis of Opioid Dependence | Admission for Opioid Toxicity |
|-------------------------------------------------------|------------------------|--------------------|----------------------------------------------------|--------------------------------|------------------------------------|-------------------------------|
| Intercept                                             |                        | -1.617             | -1.141                                             | -1.217                         | -1.522                             | -2.871                        |
| Age                                                   | Per 10 years           | -0.199             | -0.24                                              | -0.486                         | -0.462                             | -0.194                        |
| Race (Ref: white)                                     | Black                  | -0.154             | -0.065                                             | --                             | --                                 | --                            |
| Employed                                              | --                     | -0.152             | -0.061                                             | -0.058                         | --                                 | -0.025                        |
| High Risk Psychiatric Condition                       | --                     | --                 | --                                                 | 0.064                          | --                                 | 0.173                         |
| Depression                                            | --                     | 0.355              | 0.29                                               | 0.27                           | 0.345                              | 0.204                         |
| Alcohol Abuse                                         | --                     | 0.125              | 0.109                                              | 0.285                          | 0.265                              | 0.114                         |
| Non-Opioid Drug Abuse                                 |                        | 0.041              | 0.251                                              | 0.975                          | N/A                                | 0.59                          |
| Past Opioid Drug Abuse                                |                        | 0.137              | 0.056                                              | 2.542                          | N/A                                | 2.026                         |
| Alcohol Use (Ref: None)                               | Past Use               | 0.041              | --                                                 | --                             | --                                 | --                            |
| Tobacco Use (Ref:None)                                | Current Use            | 0.149              | 0.236                                              | 0.142                          | 0.109                              | --                            |
| Prior opioid use (Ref: opioid-naïve new prescription) | Opioid-naïve- No Rx    | -1.068             | N/A                                                | -0.149                         | -0.117                             | -0.274                        |
|                                                       | Prior chronic use      | 3.472              | N/A                                                | 1.227                          | 1.536                              | 0.868                         |
|                                                       | Prior intermittent use | 0.919              | N/A                                                | 0.099                          | --                                 | 0.136                         |
| BMI category (Ref: healthy weight)                    | Overweight             | -0.049             | -0.063                                             | --                             | --                                 | -0.104                        |
|                                                       | Underweight            | 0.165              | 0.206                                              | --                             | --                                 | 0.237                         |
| AJCC 7 (Ref: Stage I)                                 | Stage IV               | 0.089              | 0.05                                               | --                             | --                                 | --                            |
| Local therapy (Ref: RT)                               | Surgery                | --                 | -0.366                                             | --                             | --                                 | --                            |
|                                                       | Surgery + RT           | 0.08               | --                                                 | --                             | --                                 | --                            |
| Chemotherapy                                          |                        | 0.267              | 0.274                                              | --                             | --                                 | 0.074                         |
| <b>Interaction Terms:</b>                             |                        |                    |                                                    |                                |                                    |                               |
| Primary cancer (Ref: Prostate)                        | Esophagus              | 0.244              | 0.182                                              | --                             | --                                 | --                            |

|                          |                           |        |        |    |    |       |
|--------------------------|---------------------------|--------|--------|----|----|-------|
|                          | HNC                       | 0.162  | --     | -- | -- | --    |
|                          | Liver                     | 0.211  | --     | -- | -- | 0.122 |
|                          | Lung                      | 0.11   | 0.042  | -- | -- | --    |
|                          | Pancreas                  | 0.129  | --     | -- | -- | --    |
| Local Therapy; Primary   | Surgery + RT;<br>HNC      | 0.015  | --     | -- | -- | --    |
|                          | Surgery; Liver            | 0.008  | --     | -- | -- | --    |
|                          | Surgery + RT;<br>Pancreas | 0.878  | 0.693  | -- | -- | --    |
|                          | Surgery;<br>Prostate      | -0.272 | -0.301 | -- | -- | --    |
| Chemotherapy;<br>Primary | Chemo; Lung               | 0.005  | 0.053  | -- | -- | --    |
| AJCC 7 Stage; Primary    | II; HNC                   | 0.026  | --     | -- | -- | --    |
|                          | IV; HNC                   | 0.078  | --     | -- | -- | --    |
|                          | II; Lung                  | 0.231  | 0.402  | -- | -- | --    |
|                          | III; Lung                 | 0.57   | 0.484  | -- | -- | --    |
|                          | II; Prostate              | -0.083 | -0.041 | -- | -- | --    |

Abbreviations: LASSO, least absolute shrinkage and selection operator; RT, radiation therapy; AJCC 7, American Joint Committee on Cancer staging system 7<sup>th</sup> edition.  
\*Table of log odds covariates from final predictive models, omitting covariates not predictive in any model.
